# Supplementary material for: A sociodemographic index identifies sex-related effects on insomnia in the Hispanic Community Health Study/Study of Latinos
Source: PubMed Central journal article supplement — Sleep Adv. 2024 Aug 30;5(1):zpae064. doi: 10.1093/sleepadvances/zpae064 (PMC11417013; doi:10.1093/sleepadvances/zpae064), 2024-08-30
Supplement: zpae064_suppl_supplementary_materials.pdf [file zpae064_suppl_supplementary_materials.pdf]

A sociodemographic index identifies sex-related effects on insomnia in the  
Hispanic Community Health Study/Study of Latinos  
Supplementary Information

Natali Sorajja<sup>1,2,†</sup>, Joon Chung<sup>2,†</sup>, Carmela Alcántara<sup>3</sup>, Sylvia Wassertheil-Smoller<sup>4</sup>, Frank J Penedo<sup>5</sup>, Alberto R Ramos<sup>6</sup>, Krista M Perreira<sup>7</sup>, Martha L Daviglus<sup>8</sup>, Shakira F Suglia<sup>9</sup>, Linda C Gallo<sup>10</sup>, Peter Y Liu<sup>11</sup>, Susan Redline<sup>2</sup>, Carmen R Isasi<sup>4</sup>, Tamar Sofer<sup>1,2,12\*</sup>

<sup>1</sup>Department of Biostatistics, Harvard T.H. Chan School of Public Health, Boston, Massachusetts, USA

<sup>2</sup>Division of Sleep and Circadian Disorders, Department of Medicine, Brigham and Women's Hospital, Boston, Massachusetts, USA

<sup>3</sup>School of Social Work, Columbia University, New York, New York, USA

<sup>4</sup>Department of Epidemiology & Population Health, Albert Einstein College of Medicine, Bronx, New York, USA

<sup>5</sup>Department of Psychology, University of Miami, Miami, Florida, USA

<sup>6</sup>Department of Neurology, University of Miami Miller School of Medicine, Miami, Florida, USA

<sup>7</sup>Department of Social Medicine, University of North Carolina School of Medicine, Chapel Hill, North Carolina, USA

<sup>8</sup>Institute for Minority Health Research, University of Illinois at Chicago, Chicago, Illinois, USA

<sup>9</sup>Department of Epidemiology, Rollins School of Public Health, Atlanta, Georgia, USA

<sup>10</sup>Department of Psychology, San Diego State University, San Diego, California, USA

<sup>11</sup>Division of Genetics, Lundquist Institute at Harbor-UCLA Medical Center, Torrance, CA 90502, USA

<sup>12</sup>CardioVascular Institute (CVI), Beth Israel Deaconess Medical Center, Boston, Massachusetts, USA

†Equally contributing authors

\*Correspondence:

Tamar Sofer

Center for Life Sciences CLS-934

3 Blackfan St

Boston, MA 02115

tsofer@bidmc.harvard.edu

|                                                                                                                                                                                               |    |
|-----------------------------------------------------------------------------------------------------------------------------------------------------------------------------------------------|----|
| Supplementary Figures.....                                                                                                                                                                    | 3  |
| Supplementary Figure 1: Distribution of gendered indices in independent test dataset .....                                                                                                    | 3  |
| Supplementary Figure 2: Missingness patterns .....                                                                                                                                            | 4  |
| Supplementary Figure 3: Distribution of gendered indices in imputed data .....                                                                                                                | 5  |
| Supplementary Figure 4: Principal component analysis of demographic, acculturation, and psychological variables demonstrate similar relationship between variables in males and females ..... | 6  |
| Supplementary Tables .....                                                                                                                                                                    | 7  |
| Supplementary Table 1: Sex stratified associations of sociodemographic variables with insomnia .....                                                                                          | 7  |
| Supplementary Table 2: Sex stratified associations of sociodemographic variables with WHIIRS.....                                                                                             | 8  |
| Supplementary Table 3: Psuedo R <sup>2</sup> from association analyses with insomnia.....                                                                                                     | 9  |
| Supplementary Table 4: Association analysis of sex and gendered indices with insomnia using imputed data .....                                                                                | 10 |
| Supplementary Table 5: Association analysis of sex and gendered indices with WHIIRS (complete data) .....                                                                                     | 11 |
| Supplementary Table 6: Association analysis of sex and gendered indices with WHIIRS using imputed data .....                                                                                  | 12 |
| Supplementary Table 7: Interaction analysis of sex and gendered indices with insomnia WHIIRS (complete data) .....                                                                            | 13 |
| Supplementary Table 8: Interaction analysis of sex and gendered indices with insomnia WHIIRS (imputed data).....                                                                              | 13 |

## Supplementary Figures

Supplementary Figure 1: Distribution of gendered indices in independent test dataset

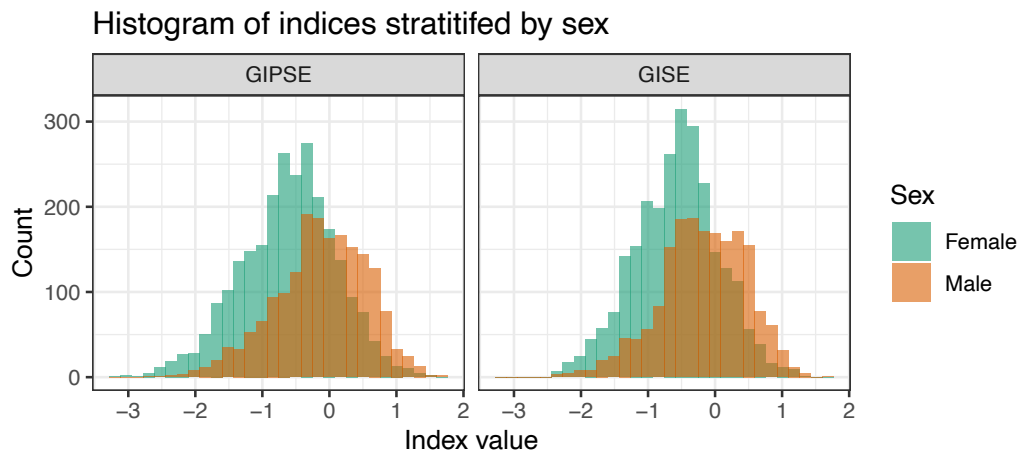

Histograms of the GISE and GIPSE, stratified by age group, in a dataset composed of 4,070 individuals who are all from different primary sampling units of the 9,596 individuals who were used to train the indices.

GISE: gendered index of sociodemographic environment; GIPSE: gendered index of psychological and sociodemographic environment.

Supplementary Figure 2: Missingness patterns

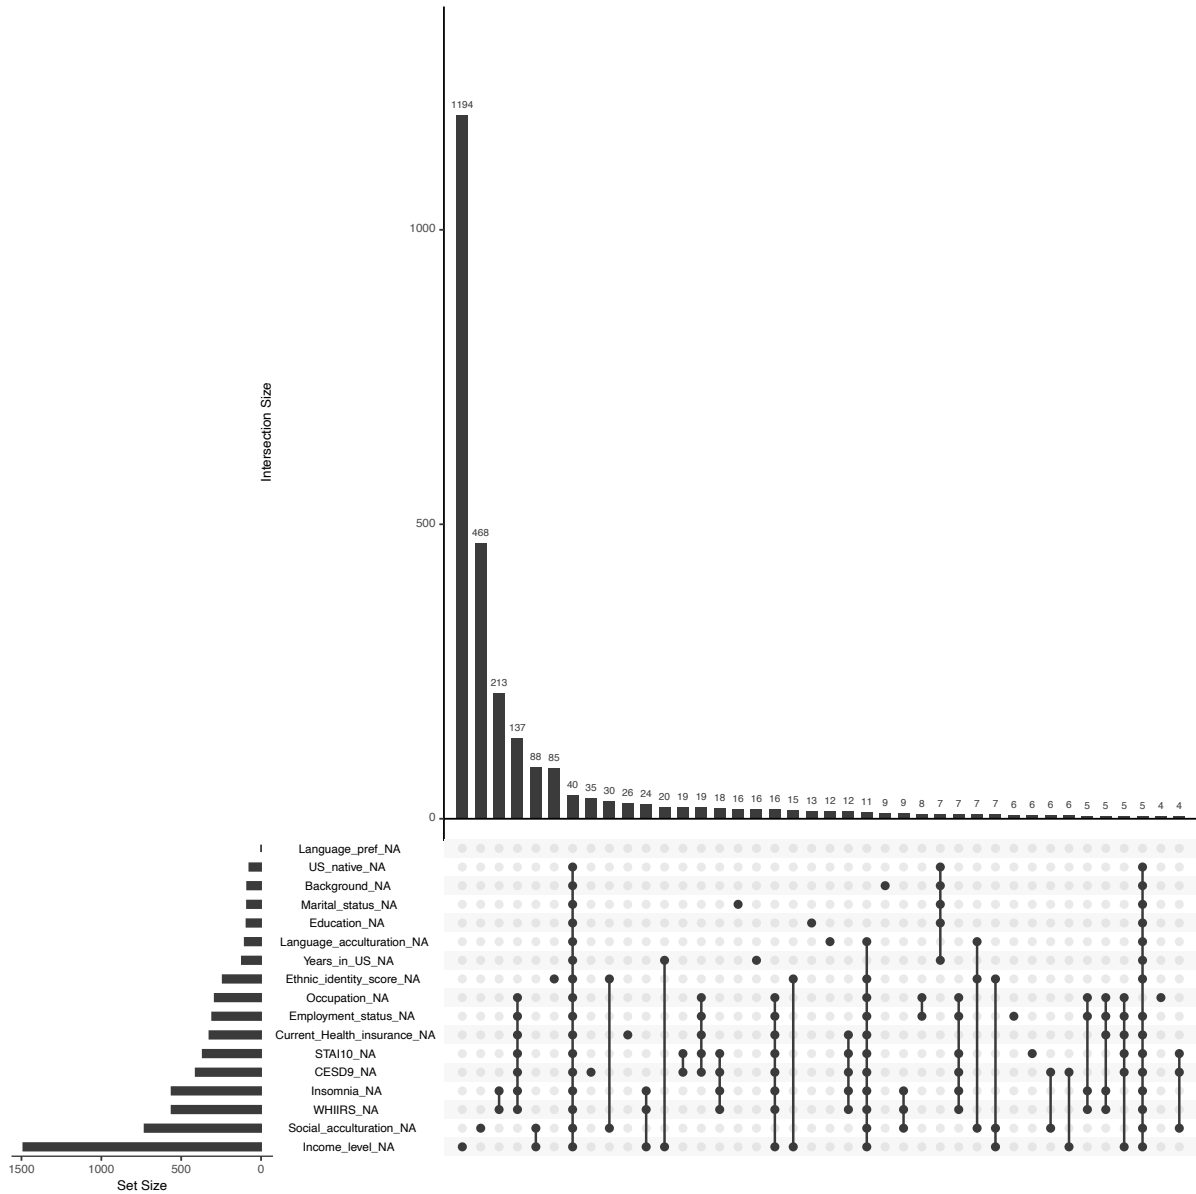

Missingness patterns across variables used in the analysis as potentially associated with socio-demographic sex-related patterns. The left panel display the various variables and cumulative number of observations with missing values for these variables. The top panel provides the number of missing values for each “pattern” of missing values, where a pattern is defined by combinations variables having missing values. The bottom right, connected point panel, describes missingness patterns. The figure only visualizes patterns observed in up to 4 observations.

Supplementary Figure 3: Distribution of gendered indices in imputed data

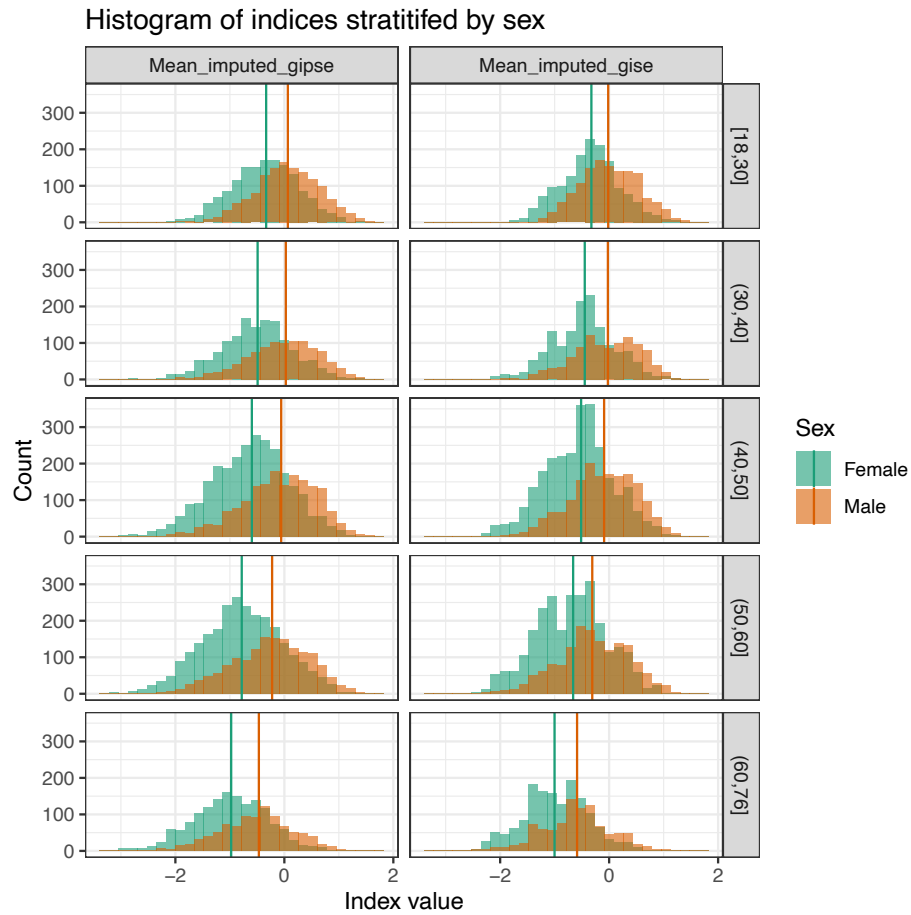

Histograms of GISE and GIPSE computed based on the imputed dataset. The lines correspond to median values of the indices within male and female participants in the relevant age group.

GISE: gendered index of sociodemographic environment; GIPSE: gendered index of psychological and sociodemographic environment.

Supplementary Figure 4: Principal component analysis of demographic, acculturation, and psychological variables demonstrate similar relationship between variables in males and females

|                                                                             | Males | Females |
|-----------------------------------------------------------------------------|-------|---------|
| Marital_statusSingle                                                        | 0.55  | 0.47    |
| Marital_statusMarried or living with a partner                              | 0.1   | 0.23    |
| Marital_statusSeparated, divorced, or widow(er)                             | 0.01  | 0.05    |
| Income_level\$10,001–\$20,000                                               | 0.11  | 0.18    |
| Income_level\$20,001–\$40,000                                               | 0.17  | 0.26    |
| Income_level\$40,001–\$75,000                                               | 0.27  | 0.25    |
| Income_levelMore than \$75,000                                              | 0.32  | 0.18    |
| Employment_statusEmployed part-time(<=35 hours/week)                        | 0.18  | 0.19    |
| Employment_statusEmployed full-time(>35 hours/week)                         | 0.3   | 0.2     |
| OccupationService Worker                                                    | 0.17  | 0.14    |
| OccupationSkilled Worker                                                    | 0.24  | 0.19    |
| OccupationProfessional/technical, administrative/executive, or office staff | 0.21  | 0.31    |
| OccupationOther occupation                                                  | 0.2   | 0.21    |
| Language_prefEnglish                                                        | 0.65  | 0.63    |
| Language_acculturation                                                      | 0.89  | 0.88    |
| Social_acculturation                                                        | 0.88  | 0.89    |
| Ethnic_identity_score                                                       | 0.79  | 0.82    |
| Current_Health_insuranceYes                                                 | 0.47  | 0.55    |
| Years_in_US10 Years or More                                                 | 0.02  | 0.16    |
| Years_in_USUS born                                                          | 0.64  | 0.56    |
| BackgroundCentral American                                                  | -0.09 | -0.08   |
| BackgroundCuban                                                             | 0.12  | 0.16    |
| BackgroundMexican                                                           | 0.27  | 0.24    |
| BackgroundPuerto Rican                                                      | 0.34  | 0.31    |
| BackgroundSouth American                                                    | -0.05 | -0.02   |
| BackgroundMore than one/Other heritage                                      | 0.21  | 0.23    |
| EducationAt most high school diploma/GED                                    | 0.27  | 0.23    |
| EducationGreater than high school/GED                                       | 0.43  | 0.47    |
| STAI10                                                                      | 0.78  | 0.77    |
| CESD9                                                                       | 0.68  | 0.68    |

Loadings of the first principal components of sociodemographic variables used, computed separately in males and in females only.

## Supplementary Tables

**Supplementary Table 1: Sex stratified associations of sociodemographic variables with insomnia**

| Exposure                                                                      | Estimated association in female stratum |                    |                     | Estimated association in male stratum |                    |                     | Sex interaction |
|-------------------------------------------------------------------------------|-----------------------------------------|--------------------|---------------------|---------------------------------------|--------------------|---------------------|-----------------|
|                                                                               | Estimated OR                            | 95% CI             | p-value             | Estimated OR                          | 95% CI             | p-value             | p-value         |
| Marital status: Married or living with a partner                              | 0.89                                    | (0.74,1.08)        | 0.250               | 0.74                                  | (0.58,0.93)        | 0.009**             | 0.146           |
| Marital status: Separated, divorced, or widow(er)                             | 1.1                                     | (0.88,1.37)        | 0.415               | 0.84                                  | (0.63,1.12)        | 0.229               | 0.084           |
| Occupation: Service Worker                                                    | 1.14                                    | (0.87,1.49)        | 0.340               | 1.01                                  | (0.74,1.39)        | 0.945               | 0.665           |
| Occupation: Skilled Worker                                                    | 0.97                                    | (0.75,1.26)        | 0.833               | 1.14                                  | (0.92,1.43)        | 0.226               | 0.437           |
| Occupation: Professional/technical, administrative/executive, or office staff | 1.04                                    | (0.82,1.32)        | 0.752               | 0.93                                  | (0.67,1.28)        | 0.639               | 0.516           |
| Occupation: Other occupation                                                  | 1.08                                    | (0.84,1.38)        | 0.558               | 1.13                                  | (0.87,1.46)        | 0.355               | 0.753           |
| Income level: \$10,001-\$20,000                                               | 0.99                                    | (0.82,1.2)         | 0.897               | 0.7                                   | (0.54,0.92)        | 0.011*              | 0.052           |
| Income level: \$20,001-\$40,000                                               | 0.85                                    | (0.68,1.06)        | 0.145               | 0.61                                  | (0.46,0.8)         | <0.001***           | 0.068           |
| Income level: \$40,001-\$75,000                                               | 0.73                                    | (0.53,0.99)        | 0.041*              | 0.65                                  | (0.47,0.9)         | 0.011*              | 0.651           |
| Income level: More than \$75,000                                              | 0.51                                    | (0.33,0.78)        | 0.002**             | 0.5                                   | (0.28,0.89)        | 0.019*              | 0.923           |
| Employment status: Employed part-time (<=35 hours/week)                       | 0.79                                    | (0.65,0.96)        | 0.019*              | 0.77                                  | (0.59,1.01)        | 0.059               | 0.945           |
| Employment status: Employed full-time (>35 hours/week)                        | 0.71                                    | (0.6,0.84)         | <0.001***           | 0.66                                  | (0.54,0.81)        | <0.001***           | 0.761           |
| Education: At most high school diploma/GED                                    | 0.94                                    | (0.75,1.18)        | 0.588               | 1.1                                   | (0.87,1.39)        | 0.426               | 0.262           |
| Education: Greater than high school/GED                                       | <b>0.8</b>                              | <b>(0.67,0.96)</b> | <b>0.016*</b>       | <b>1.07</b>                           | <b>(0.86,1.35)</b> | <b>0.531</b>        | <b>0.050</b>    |
| Years in US: 10 Years or More                                                 | 1.13                                    | (0.94,1.36)        | 0.190               | 1.12                                  | (0.89,1.42)        | 0.328               | 0.657           |
| Years in US: US born                                                          | 1.47                                    | (1.13,1.91)        | 0.004**             | 1.54                                  | (1.13,2.11)        | 0.007**             | 0.761           |
| Language acculturation                                                        | 1.12                                    | (1.02,1.21)        | 0.012*              | 1.15                                  | (1.04,1.27)        | 0.008**             | 0.375           |
| Social acculturation                                                          | 1.05                                    | (0.91,1.22)        | 0.494               | 0.97                                  | (0.82,1.16)        | 0.772               | 0.591           |
| Ethnic identity score                                                         | 0.98                                    | (0.86,1.12)        | 0.797               | 0.97                                  | (0.83,1.14)        | 0.730               | 0.869           |
| STAI10                                                                        | <b>1.12</b>                             | <b>(1.1,1.13)</b>  | <b>&lt;0.001***</b> | <b>1.15</b>                           | <b>(1.13,1.17)</b> | <b>&lt;0.001***</b> | <b>0.007**</b>  |
| CESD9                                                                         | 1.13                                    | (1.11,1.15)        | <0.001***           | 1.13                                  | (1.1,1.15)         | <0.001***           | 0.705           |
| Language preference                                                           | 1.21                                    | (0.97,1.5)         | 0.086               | 1.43                                  | (1.11,1.84)        | 0.005**             | 0.188           |
| Current health insurance                                                      | 0.84                                    | (0.7,1)            | 0.047*              | 0.9                                   | (0.74,1.09)        | 0.274               | 0.909           |

Association analyses were performed separately within each sex stratum, using complete data. Interaction test was performed in a combined-sex analysis, with a multiplicative interaction term. Each sociodemographic variable was assessed in a separate analysis, but variables with multiple levels were included in the same regression model. Analyses were adjusted for age, study center, self-reported Hispanic/Latino background (and combined-sex model to sex as well). We used survey logistic regression with quasibinomial link function.

Supplementary Table 2: Sex stratified associations of sociodemographic variables with WHIIRS

| Exposure                                                                      | Estimated association in female stratum |                    |           | Estimated association in male stratum |                    |           | Sex interaction |
|-------------------------------------------------------------------------------|-----------------------------------------|--------------------|-----------|---------------------------------------|--------------------|-----------|-----------------|
|                                                                               | Estimated effect                        | 95% CI             | p-value   | Estimated effect                      | 95% CI             | p-value   | p-value         |
| Marital status: Married or living with a partner                              | 0.67                                    | (0.43,1.04)        | 0.073     | 0.5                                   | (0.31,0.81)        | 0.005**   | 0.479           |
| Marital status: Separated, divorced, or widow(er)                             | 1.48                                    | (0.85,2.58)        | 0.165     | 0.84                                  | (0.44,1.6)         | 0.603     | 0.086           |
| Occupation: Service Worker                                                    | 1.12                                    | (0.61,2.04)        | 0.714     | 1.61                                  | (0.82,3.15)        | 0.167     | 0.418           |
| Occupation: Skilled Worker                                                    | 0.98                                    | (0.58,1.65)        | 0.934     | 1.62                                  | (1.05,2.51)        | 0.030*    | 0.256           |
| Occupation: Professional/technical, administrative/executive, or office staff | 1.01                                    | (0.59,1.7)         | 0.985     | 1.06                                  | (0.57,1.97)        | 0.842     | 0.895           |
| Occupation: Other occupation                                                  | 1.21                                    | (0.67,2.18)        | 0.526     | 1.16                                  | (0.71,1.91)        | 0.551     | 0.849           |
| Income level: \$10,001-\$20,000                                               | 0.62                                    | (0.38,1)           | 0.048*    | 0.33                                  | (0.16,0.66)        | 0.002**   | 0.183           |
| Income level: \$20,001-\$40,000                                               | 0.38                                    | (0.22,0.65)        | <0.001*** | 0.22                                  | (0.11,0.45)        | <0.001*** | 0.382           |
| Income level: \$40,001-\$75,000                                               | 0.31                                    | (0.17,0.59)        | <0.001*** | 0.27                                  | (0.12,0.57)        | <0.001*** | 0.941           |
| Income level: More than \$75,000                                              | 0.16                                    | (0.06,0.41)        | <0.001*** | 0.18                                  | (0.07,0.46)        | <0.001*** | 0.636           |
| Employment status: Employed part-time (<=35 hours/week)                       | 0.54                                    | (0.34,0.84)        | 0.007**   | 0.41                                  | (0.24,0.69)        | <0.001*** | 0.786           |
| Employment status: Employed full-time (>35 hours/week)                        | 0.38                                    | (0.25,0.57)        | <0.001*** | 0.3                                   | (0.2,0.45)         | <0.001*** | 0.728           |
| Education: At most high school diploma/GED                                    | 0.76                                    | (0.46,1.26)        | 0.290     | 0.97                                  | (0.59,1.6)         | 0.912     | 0.271           |
| Education: Greater than high school/GED                                       | <b>0.49</b>                             | <b>(0.31,0.75)</b> | 0.001**   | <b>1.01</b>                           | <b>(0.63,1.62)</b> | 0.972     | 0.012*          |
| Years in US: 10 Years or More                                                 | 1.27                                    | (0.85,1.92)        | 0.248     | 1.3                                   | (0.83,2.04)        | 0.258     | 0.498           |
| Years in US: US born                                                          | 2.77                                    | (1.57,4.86)        | <0.001*** | 4.21                                  | (2.36,7.48)        | <0.001*** | 0.338           |
| Language acculturation                                                        | 1.43                                    | (1.19,1.71)        | <0.001*** | 1.6                                   | (1.33,1.93)        | <0.001*** | 0.300           |
| Social acculturation                                                          | 1.11                                    | (0.78,1.57)        | 0.579     | 1.28                                  | (0.94,1.74)        | 0.114     | 0.551           |
| Ethnic identity score                                                         | 0.9                                     | (0.66,1.24)        | 0.524     | 0.92                                  | (0.68,1.24)        | 0.564     | 0.935           |
| STAI10                                                                        | <b>1.38</b>                             | <b>(1.34,1.41)</b> | <0.001*** | <b>1.44</b>                           | <b>(1.39,1.49)</b> | <0.001*** | 0.042*          |
| CESD9                                                                         | 1.43                                    | (1.39,1.48)        | <0.001*** | 1.39                                  | (1.34,1.45)        | <0.001*** | 0.135           |
| Language preference                                                           | 1.78                                    | (1.13,2.82)        | 0.013*    | 2.84                                  | (1.74,4.64)        | <0.001*** | 0.207           |
| Current health insurance                                                      | 0.71                                    | (0.48,1.04)        | 0.078     | 0.83                                  | (0.57,1.22)        | 0.353     | 0.680           |

Association analyses were performed separately within each sex stratum, using complete data. Interaction test was performed in a combined-sex analysis, with a multiplicative interaction term. Each sociodemographic variable was assessed in a separate analysis, but variables with multiple levels were included in the same regression model. Analyses were adjusted for age, study center, self-reported Hispanic/Latino background (and combined-sex model to sex as well). We used survey linear regression with gaussian link function.



Supplementary Table 3: Psuedo R<sup>2</sup> from association analyses with insomnia

| <b>model</b>                                                    | <b>Sex combined analysis</b> | <b>Male stratum</b> | <b>Female stratum</b> |
|-----------------------------------------------------------------|------------------------------|---------------------|-----------------------|
| <b>Model 0: adjusting for covariates without sex adjustment</b> | 4.36                         | 3.55                | 5.3                   |
| <b>Model 1: adjusting for covariates.</b>                       | 5.56                         | -                   | -                     |
| <b>Model 2: adjusting for covariates, GISE</b>                  | 5.64                         | 3.61                | 5.42                  |
| <b>Model 3: adjusting for covariates, GIPSE</b>                 | 8.09                         | 5.46                | 8.53                  |
| <b>Model 4: adjusting for covariates, components of GISE</b>    | 6.89                         | 5.21                | 6.82                  |
| <b>Model 5: adjusting for covariates, components of GIPSE</b>   | 14.62                        | 12.64               | 15.27                 |

Pseudo R<sup>2</sup> are reported on percentage scale for interpretability.

Sex-combined n=13,666; male n=5,593; female n=8,083.

Adjusting covariates were age, Hispanic/Latino background, and study center.

GISE: gendered index of sociodemographic environment; GIPSE: gendered index of psychological and sociodemographic environment.

Supplementary Table 4: Association analysis of sex and gendered indices with insomnia using imputed data

| Model                                                                  | Estimated male sex effect |             |           | Estimated gendered index effect |             |           |
|------------------------------------------------------------------------|---------------------------|-------------|-----------|---------------------------------|-------------|-----------|
|                                                                        | Estimated OR              | 95% CI      | p-value   | Estimated OR                    | 95% CI      | p-value   |
| <b>Model 1: adjusting for baseline covariates.</b>                     | 0.61                      | (0.55,0.67) | <0.001*** | NA                              | NA          | NA        |
| <b>Model 2: adjusting for baseline covariates, GISE</b>                | 0.63                      | (0.57,0.70) | <0.001*** | 0.93                            | (0.88,0.99) | 0.016*    |
| <b>Model 3: adjusting for baseline covariates, GIPSE</b>               | 0.79                      | (0.71,0.88) | <0.001*** | 0.65                            | (0.61,0.69) | <0.001*** |
| <b>Model 4: adjusting for baseline covariates, components of GISE</b>  | 0.63                      | (0.56,0.70) | <0.001*** | NA                              | NA          | NA        |
| <b>Model 5: adjusting for baseline covariates, components of GIPSE</b> | 0.75                      | (0.66,0.84) | <0.001*** | NA                              | NA          | NA        |
| <b>Analysis in male stratum</b>                                        |                           |             |           |                                 |             |           |
| <b>Model adjusting for baseline covariates, GISE</b>                   | NA                        | NA          | NA        | 0.95                            | (0.86,1.03) | 0.194     |
| <b>Model adjusting for baseline covariates, GIPSE</b>                  | NA                        | NA          | NA        | 0.68                            | (0.62,0.75) | <0.001*** |
| <b>Analysis in Female stratum</b>                                      |                           |             |           |                                 |             |           |
| <b>Model adjusting for baseline covariates, GISE</b>                   | NA                        | NA          | NA        | 0.92                            | (0.85,0.99) | 0.030*    |
| <b>Model adjusting for baseline covariates, GIPSE</b>                  | NA                        | NA          | NA        | 0.63                            | (0.58,0.68) | <0.001*** |

Supplementary Table 5: Association analysis of sex and gendered indices with WHIIRS (complete data)

| Model                                                                  | Estimated male sex effect |               |           | Estimated gendered index effect |               |           |
|------------------------------------------------------------------------|---------------------------|---------------|-----------|---------------------------------|---------------|-----------|
|                                                                        | Estimated effect          | 95% CI        | p-value   | Estimated effects               | 95% CI        | p-value   |
| <b>Model 1: adjusting for baseline covariates.</b>                     | -1.25                     | (-1.51,-0.99) | <0.001*** | NA                              | NA            | NA        |
| <b>Model 2: adjusting for baseline covariates, GISE</b>                | -1.11                     | (-1.38,-0.84) | <0.001*** | -0.23                           | (-0.38,-0.09) | 0.002**   |
| <b>Model 3: adjusting for baseline covariates, GIPSE</b>               | -0.47                     | (-0.75,-0.2)  | <0.001*** | -1.18                           | (-1.32,-1.03) | <0.001*** |
| <b>Model 4: adjusting for baseline covariates, components of GISE</b>  | -1.12                     | (-1.39,0.85)  | <0.001*** | NA                              | NA            | NA        |
| <b>Model 5: adjusting for baseline covariates, components of GIPSE</b> | -0.6                      | (-0.85,0.35)  | <0.001*** | NA                              | NA            | NA        |
| <b>Analysis in male stratum</b>                                        |                           |               |           |                                 |               |           |
| <b>Model adjusting for baseline covariates, GISE</b>                   | NA                        | NA            | NA        | -0.26                           | (-0.45,-0.06) | 0.010**   |
| <b>Model adjusting for baseline covariates, GIPSE</b>                  | NA                        | NA            | NA        | -1.05                           | (-1.26,-0.85) | <0.001*** |
| <b>Analysis in Female stratum</b>                                      |                           |               |           |                                 |               |           |
| <b>Model adjusting for baseline covariates, GISE</b>                   | NA                        | NA            | NA        | -0.22                           | (-0.44,-0.01) | 0.042*    |
| <b>Model adjusting for baseline covariates, GIPSE</b>                  | NA                        | NA            | NA        | -1.29                           | (-1.5,-1.09)  | <0.001*** |

Supplementary Table 6: Association analysis of sex and gendered indices with WHIIRS using imputed data

| Model                                                                  | Estimated male sex effect |               |           |                   | Estimated gendered index effect |           |
|------------------------------------------------------------------------|---------------------------|---------------|-----------|-------------------|---------------------------------|-----------|
|                                                                        | Estimated effect          | 95% CI        | p-value   | Estimated effects | 95% CI                          | p-value   |
| <b>Model 1: adjusting for baseline covariates.</b>                     | -1.26                     | (-1.49,-1.03) | <0.001*** | NA                | NA                              | NA        |
| <b>Model 2: adjusting for baseline covariates, GISE</b>                | -1.14                     | (-1.37,-0.9)  | <0.001*** | -0.21             | (-0.34,-0.07)                   | 0.003**   |
| <b>Model 3: adjusting for baseline covariates, GIPSE</b>               | -0.49                     | (-0.73,-0.24) | <0.001*** | -1.19             | (-1.32,-1.06)                   | <0.001*** |
| <b>Model 4: adjusting for baseline covariates, components of GISE</b>  | -1.14                     | (-1.38,-0.91) | <0.001*** | NA                | NA                              | NA        |
| <b>Model 5: adjusting for baseline covariates, components of GIPSE</b> | -0.6                      | (-0.82,-0.38) | <0.001*** | NA                | NA                              | NA        |
| <b>Analysis in male stratum</b>                                        |                           |               |           |                   |                                 |           |
| <b>Model adjusting for baseline covariates, GISE</b>                   | NA                        | NA            | NA        | -0.24             | (-0.42,-0.05)                   | 0.013*    |
| <b>Model adjusting for baseline covariates, GIPSE</b>                  | NA                        | NA            | NA        | -1.06             | (-1.25,-0.86)                   | <0.001*** |
| <b>Analysis in Female stratum</b>                                      |                           |               |           |                   |                                 |           |
| <b>Model adjusting for baseline covariates, GISE</b>                   | NA                        | NA            | NA        | -0.19             | (-0.39,0.01)                    | 0.059     |
| <b>Model adjusting for baseline covariates, GIPSE</b>                  | NA                        | NA            | NA        | -1.3              | (-1.48,-1.12)                   | <0.001*** |

Supplementary Table 7: Interaction analysis of sex and gendered indices with insomnia WHIIRS (complete data)

| Outcome  | Index | Male sex effect  |               |           | Index effect     |               |           | Index-male sex multiplicative effect |              |         |
|----------|-------|------------------|---------------|-----------|------------------|---------------|-----------|--------------------------------------|--------------|---------|
|          |       | Estimated effect | 95% CI        | p-value   | Estimated effect | 95% CI        | p-value   | Estimated effect                     | 95% CI       | p-value |
| Insomnia | GISE  | 0.63             | (0.56,0.71)   | <0.001*** | 0.91             | (0.84,0.98)   | 0.015*    | 1.04                                 | (0.93,1.17)  | 0.458   |
| Insomnia | GIPSE | 0.79             | (0.69,0.89)   | <0.001*** | 0.63             | (0.58,0.68)   | <0.001*** | 1.1                                  | (0.97,1.24)  | 0.140   |
| WHIIRS   | GISE  | -1.11            | (-1.38,-0.84) | <0.001*** | -0.27            | (-0.48,-0.07) | 0.009**   | 0.08                                 | (-0.18,0.35) | 0.537   |
| WHIIRS   | GIPSE | -0.48            | (-0.75,-0.2)  | <0.001*** | -1.33            | (-1.53,-1.13) | <0.001*** | 0.32                                 | (0.04,0.6)   | 0.024*  |

Association analyses used complete data (n=13,666 individuals) and used survey regression, using the R survey package, to account for study design (stratification, sampling, non-response, etc.). When insomnia was the outcome, we used survey logistic regression with quasibinomial link function. When WHIIRS was the outcome, we used survey linear regression with gaussian link function. Association models were adjusted for age, study center, and self-reported Hispanic/Latino background.

Supplementary Table 8: Interaction analysis of sex and gendered indices with insomnia WHIIRS (imputed data)

| Outcome  | Index | Male sex effect  |               |           | Index effect     |               |           | Index-male sex multiplicative effect |              |         |
|----------|-------|------------------|---------------|-----------|------------------|---------------|-----------|--------------------------------------|--------------|---------|
|          |       | Estimated effect | 95% CI        | p-value   | Estimated effect | 95% CI        | p-value   | Estimated effect                     | 95% CI       | p-value |
| Insomnia | GISE  | 0.63             | (0.57,0.71)   | <0.001*** | 0.91             | (0.85,0.98)   | 0.012*    | 1.05                                 | (0.94,1.17)  | 0.361   |
| Insomnia | GIPSE | 0.8              | (0.72,0.9)    | <0.001*** | 0.62             | (0.58,0.67)   | <0.001*** | 1.1                                  | (0.99,1.23)  | 0.089   |
| WHIIRS   | GISE  | -1.14            | (-1.37,-0.9)  | <0.001*** | -0.25            | (-0.44,-0.06) | 0.011*    | 0.08                                 | (-0.17,0.34) | 0.532   |
| WHIIRS   | GIPSE | -0.5             | (-0.74,-0.25) | <0.001*** | -1.33            | (-1.51,-1.16) | <0.001*** | 0.32                                 | (0.06,0.57)  | 0.014*  |

Association analyses used multiply-imputed data (n=16,415 individuals) and used survey regression, using the R survey package, to account for study design (stratification, sampling, non-response, etc.). When insomnia was the outcome, we used survey logistic regression with quasibinomial link function. When WHIIRS was the outcome, we used survey linear regression with gaussian link function. Association models were adjusted for age, study center, and self-reported Hispanic/Latino background. Results from the 5 imputed datasets were combined using Rubin's rule.
